# Supplementary material for: Association between Relative Thrombocytosis and Microalbuminuria in Adults with Mild Fasting Hyperglycemia
Source: MDPI journal article supplement (doi:10.3390/jpm14010089), 2024-01-12
Supplement: s1 [file s1]

Supplemental Table S1. Reference values for anthropometric variables and laboratory tests

|                                       |                                           |
|---------------------------------------|-------------------------------------------|
| Body mass index (kg/m <sup>2</sup> )  | Pre-obese: 23-24.9, Obese: >25            |
| Waist circumference (cm)              | Male: ≥90, Female: ≥85                    |
| White blood cell (10 <sup>9</sup> /L) | 3.5-10.0                                  |
| Hemoglobin (g/dL)                     | Male: 13.3-17.2, Female: 11.0-15.0        |
| Platelet (10 <sup>3</sup> /μL)        | Male: 131-404, Female: 149-393            |
| FBS (mg/dL)                           | 75-99                                     |
| Hemoglobin A1c (%)                    | 4.4-6.4                                   |
| AST (IU/L)                            | Male: 0-40, Female: 0-32                  |
| ALT (IU/L)                            | Male: 0-41, Female: 0-33                  |
| Triglyceride (mg/dL)                  | 40-155                                    |
| HDL cholesterol (mg/dL)               | 30-70                                     |
| LDL cholesterol (mg/dL)               | 0-142                                     |
| 25-vitamin D (ng/mL)                  | Deficiency: <20, Insufficiency: 20.0-29.9 |
| UACR (mg/g creatinine)                | 0-30                                      |
